# Supplementary material for: Perillaldehyde Inhibits AHR Signaling and Activates NRF2 Antioxidant Pathway in Human Keratinocytes
Source: Oxid Med Cell Longev. 2018 Feb 14;2018:9524657. doi: 10.1155/2018/9524657 (PMC5832143; doi:10.1155/2018/9524657)
Supplement: Supplementary 1 — Figure S1: (A) PAH (up to 1000 μM) alone did not affect the viability of HaCaT cells. (B) PAH (up to 1000 μM) in the presence of BaP (1 μM) did not affect the viability of HaCaT cells. [file 9524657.f1.zip]

Archive with 2 entries (2 files):
- 9524657.f1/FigS1A 171212 PAH_OMCL_2116222.eps
- 9524657.f1/FigS1B 171212 PAH_OMCL_2116223.eps
