# Supplementary material for: Perillaldehyde Inhibits AHR Signaling and Activates NRF2 Antioxidant Pathway in Human Keratinocytes
Source: Oxid Med Cell Longev. 2018 Feb 14;2018:9524657. doi: 10.1155/2018/9524657 (PMC5832143; doi:10.1155/2018/9524657)
Supplement: Supplementary 2 — Figure S2: (A) BaP upregulates the IL1B expression and it is inhibited in the presence of PAH in HaCaT keratinocytes. ∗∗ p < 0.01. (B) However, the production of IL-1β protein is not affected by BaP and PAH. [file 9524657.f2.zip]

Archive with 2 entries (2 files):
- 9524657.f2/FigS2A 171212 PAH_OMCL_2116224.eps
- 9524657.f2/FigS2B 171212 PAH_OMCL_2116225.eps
